# Supplementary material for: Rapid in situ growth of high-entropy oxide nanoparticles with reversible spinel structures for efficient Li storage
Source: Royal Society of Chemistry journal article supplement (doi:10.1039/d3ta08101j), 2024-01-01
Supplement: d3ta08101j1.pdf [file d3ta08101j1.pdf]

Supporting Information for

Rapid In-situ Growth of High-entropy Oxide Nanoparticles with Reversible Spinel Structure  
for Efficient Li Storage

Siyu Zhu<sup>1, †</sup>, Wei Nong<sup>1, 2, †</sup>, Lim Jun Ji Nicholas<sup>1</sup>, Xun Cao<sup>1</sup>, Peilin Zhang<sup>3</sup>, Yu Lu<sup>1</sup>,  
Mingzhen Xiu<sup>4</sup>, Gang Wu<sup>2</sup>, Shuo-Wang Yang<sup>2</sup>, Zheng Liu<sup>1</sup>, Madhavi Srinivasan<sup>1\*</sup>, Kedar  
Hippalgaonkar<sup>1, 5\*</sup>, Yizhong Huang<sup>1\*</sup>

<sup>1</sup> School of Materials Science and Engineering, Nanyang Technological University, 50 Nanyang Avenue, Singapore 639798, Singapore

<sup>2</sup> Institute of High Performance Computing, Agency for Science, Technology and Research, 1 Fusionopolis Way, Connexis, Singapore 138632, Singapore

<sup>3</sup> School of mechanical and electrical engineering, Jiaying Nanhu University, Jiaying 314001, China

<sup>4</sup> Energy Research Institute, Interdisciplinary Graduate Programme, Nanyang Technological University, Singapore

<sup>5</sup> Institute of Materials Research and Engineering, Agency for Science, Technology and Research, Singapore 138634, Singapore

\* Corresponding authors: madhavi@ntu.edu.sg; kedar@ntu.edu.sg; [yzhuang@ntu.edu.sg](mailto:y Zhuang@ntu.edu.sg)

† Siyu Zhu and Wei Nong contributed equally to this work

## Entropy estimation

The configuration/mixing entropy ( $S$ ) of spinel HEO per formula is calculated by the following equation<sup>1</sup>,

$$S = -R \sum_{\text{site}} m_{\text{site}} \sum_i^N x_{i,\text{site}} \ln x_{i,\text{site}}, \quad \sum_i^N x_i = 1 \quad \text{Eq. S1}$$

where  $R$  is gas constant,  $m_{\text{site}}$  is the multiplicity per formula of a crystallographic site, and  $x_i$  is the molar fraction of element  $i$  on the corresponding site, which meets normality.

## Stability evaluation

The stability of the HEO is evaluated by the reaction energy (enthalpy) of decomposing HEO phase into the respective most stable mono-metal oxides,  $\Delta H_d$ , as follows,

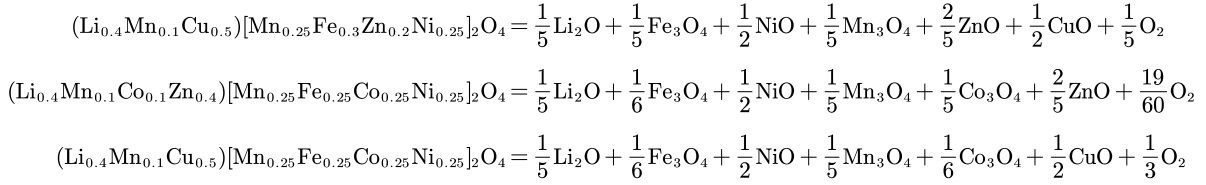

the ground states of  $\text{Li}_2\text{O}$  ( $Fm-3m$ ),  $\text{Fe}_3\text{O}_4$  ( $Fd-3m$ ),  $\text{NiO}$  ( $Fm-3m$ ),  $\text{Mn}_3\text{O}_4$  ( $I4_1/amd$ ),  $\text{Co}_3\text{O}_4$  ( $Fd-3m$ ),  $\text{CuO}$  ( $C2/c$ ),  $\text{ZnO}$  ( $P6_3mc$ ),  $\text{O}_2$  ( $C2/m$ ) were adopted as references.

Then  $\Delta H_d$  is calculated by

$$\Delta H_d = \sum_j c_j \cdot E_j - E_{\text{HEO}} \quad \text{Eq. S2}$$

where  $c_i$  and  $E_j$  are the coefficient and DFT+ $U$ -calculated total energy (per formula) of decomposed product  $i$ ,  $E_{\text{HEO}}$  is the DFT+ $U$ -calculated total energy per spinel formula of the corresponding HEO. The ground-state magnetic configurations are used for respective mono-metal oxides, e.g.,  $\text{Li}_2\text{O}$  is nonmagnetic,  $\text{Fe}_3\text{O}_4$  is ferrimagnetic,  $\text{Co}_3\text{O}_4$  is ferromagnetic,  $\text{NiO}$  is antiferromagnetic,  $\text{Mn}_3\text{O}_4$  is ferrimagnetic,  $\text{CuO}$  is paramagnetic and  $\text{ZnO}$  is diamagnetic.

**Table S1.** Metal concentrations (ppb), contents (mol) by ICP-MS method in HEOs samples, and normalized coefficients ( $x$ ) in one spinel formula ( $M_3O_4$ )

| Concentration | Co    | Ni    | Zn    | Li                                               | Fe    | Mn    | Cu    |
|---------------|-------|-------|-------|--------------------------------------------------|-------|-------|-------|
|               |       |       |       | (ppb)                                            |       |       |       |
| LFNM-CuZn     | —     | 49.10 | 48.30 | 5.01                                             | 51.90 | 58.40 | 56.40 |
| LFNM-CoZn     | 32.50 | 28.10 | 27.50 | 3.09                                             | 26.70 | 32.60 | —     |
| LFNM-CoCu     | 38.80 | 37.70 | —     | 4.66                                             | 39.40 | 42.90 | 40.30 |
|               |       |       |       | (mol)                                            |       |       |       |
| LFNM-CuZn     | —     | 0.84  | 0.74  | 0.72                                             | 0.93  | 1.06  | 0.89  |
| LFNM-CoZn     | 0.55  | 0.48  | 0.42  | 0.45                                             | 0.48  | 0.59  | —     |
| LFNM-CoCu     | 0.66  | 0.64  | —     | 0.67                                             | 0.71  | 0.78  | 0.63  |
|               |       |       |       | $x$ in spinel $[M_x]O_4$ , $\sum x = 3$          |       |       |       |
| LFNM-CuZn     | —     | 0.48  | 0.43  | 0.42                                             | 0.54  | 0.62  | 0.51  |
| LFNM-CoZn     | 0.56  | 0.48  | 0.42  | 0.45                                             | 0.48  | 0.60  | —     |
| LFNM-CoCu     | 0.48  | 0.47  | —     | 0.49                                             | 0.51  | 0.57  | 0.46  |
|               |       |       |       | $x$ in spinel $[M_x]O_4$ used for SQS generation |       |       |       |
| LFNM-CuZn     | —     | 0.5   | 0.4   | 0.4                                              | 0.6   | 0.6   | 0.5   |
| LFNM-CoZn     | 0.6   | 0.5   | 0.4   | 0.4                                              | 0.5   | 0.6   | —     |
| LFNM-CoCu     | 0.5   | 0.5   | —     | 0.5                                              | 0.5   | 0.6   | 0.5   |

**Table S2.** Entropy estimates for the prepared HEOs

| HEO       | Reduced formula                                                                 | $S_{\text{config}}$ ( $R/\text{formula}$ ) |
|-----------|---------------------------------------------------------------------------------|--------------------------------------------|
| LFNM-CuZn | $(Li_{0.4}Mn_{0.1}Cu_{0.5})[Mn_{0.25}Fe_{0.3}Zn_{0.2}Ni_{0.25}]_2O_4$           | 3.70                                       |
| LFNM-CoZn | $(Li_{0.4}Mn_{0.1}Co_{0.1}Zn_{0.4})[Mn_{0.25}Fe_{0.25}Co_{0.25}Ni_{0.25}]_2O_4$ | 3.97                                       |
| LFNM-CoCu | $(Li_{0.4}Mn_{0.1}Cu_{0.5})[Mn_{0.25}Fe_{0.25}Co_{0.25}Ni_{0.25}]_2O_4$         | 3.71                                       |

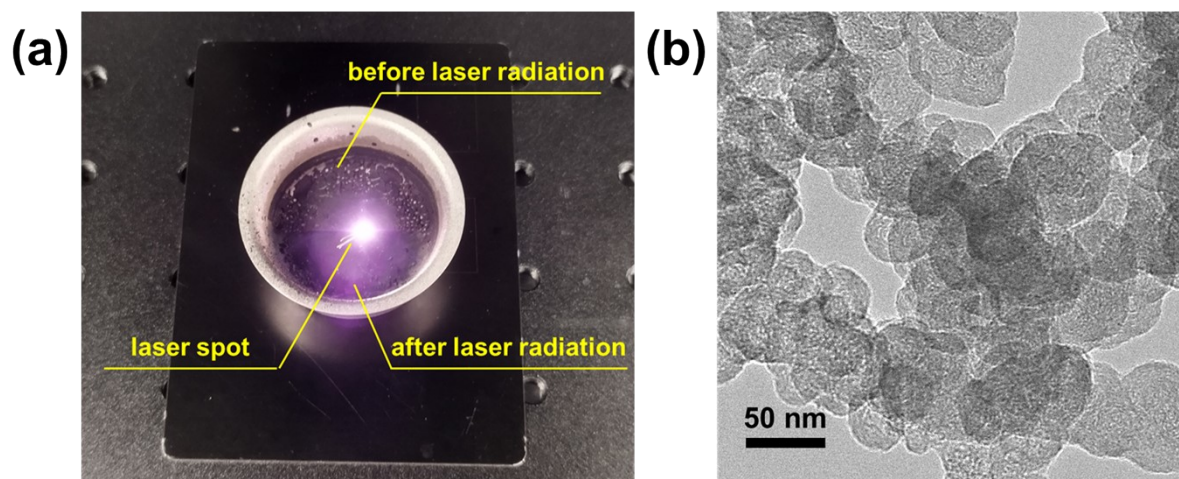

**Figure S1.** a) Photograph taken during the laser preparation process. b) TEM images of carbon black substrate

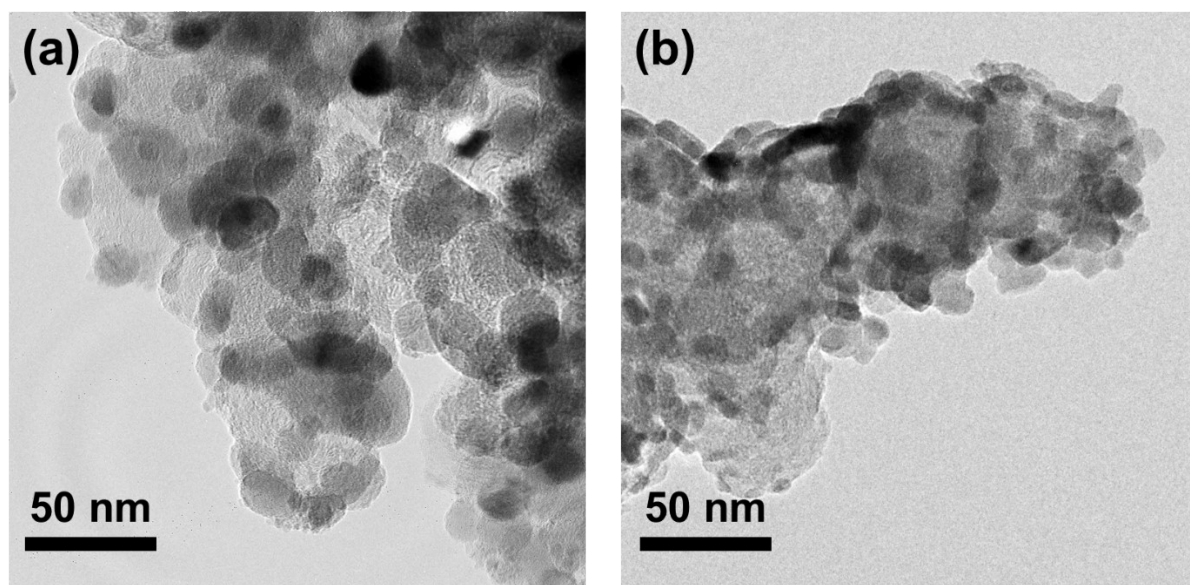

**Figure S2.** TEM images of a) LFNM-CoCu and b) LFNM-CoZn.

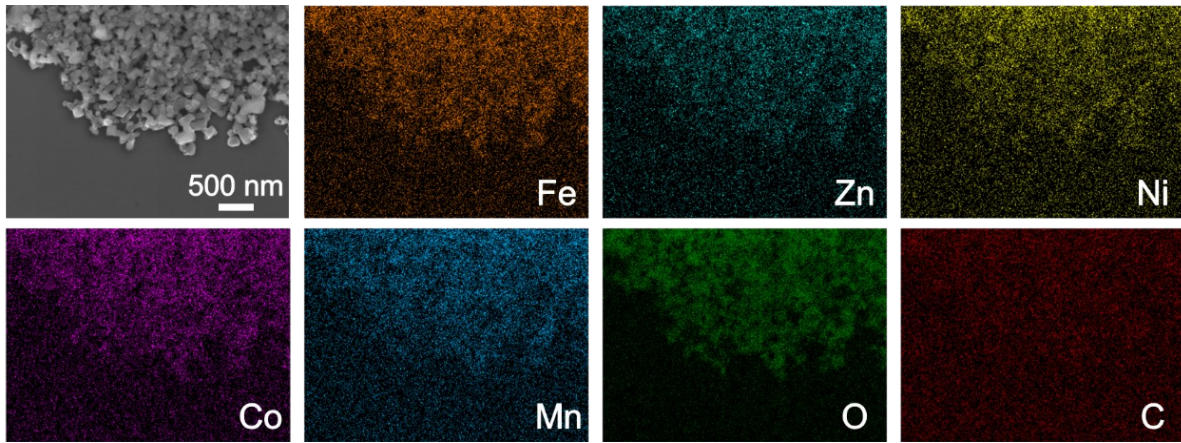

**Figure S3.** FESEM images and EDX mappings of bulk-HEO after 800 °C annealing process.

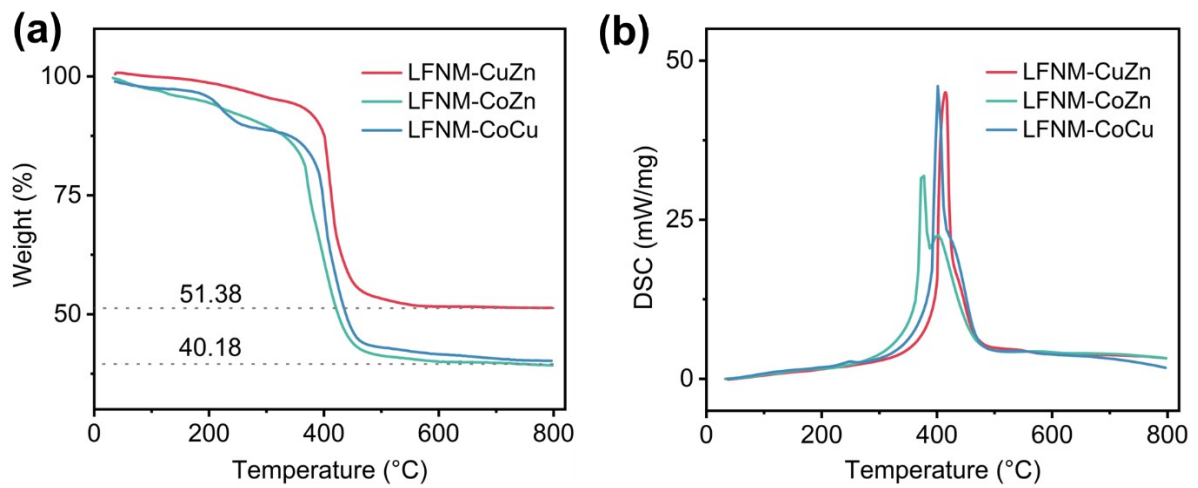

**Figure S4.** a) TG and b) DSC curves of HEO nanoparticle composite electrode material samples.

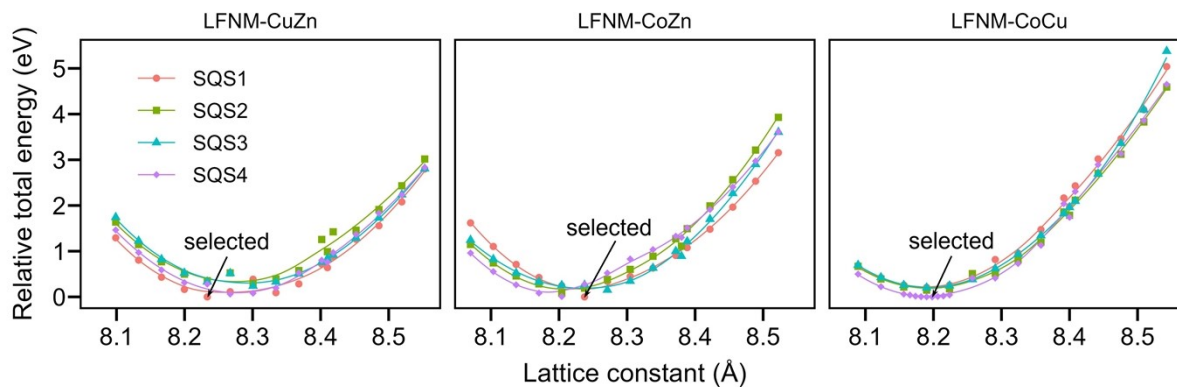

**Figure S5.** Total energy of SQS as a function of lattice constant of spinel. The relative total energy is referenced to the lowest value in each HEO model.

**Table S3.** Lattice constant of representative SQS cells as obtained from **Figure S5**

| HEO       | Calculated Lattice constant (Å) |
|-----------|---------------------------------|
| LFNM-CuZn | 8.23339                         |
| LFNM-CoZn | 8.23754                         |
| LFNM-CoCu | 8.19819                         |

**Table S4.** DFT+*U*-calculated total energies of metal oxides and decomposition energies of HEOs

| Oxide                          | $Z^a$          | $E_{\text{DFT}}$ (eV) | $E_{\text{DFT}}$ (eV/formula) | $\Delta H_{\text{d}}$ (eV/formula) |
|--------------------------------|----------------|-----------------------|-------------------------------|------------------------------------|
| Co <sub>3</sub> O <sub>4</sub> | 2 <sup>b</sup> | -84.962               | -42.481                       |                                    |
| CuO                            | 4              | -39.431               | -9.858                        |                                    |
| Fe <sub>3</sub> O <sub>4</sub> | 2 <sup>b</sup> | -93.182               | -46.591                       |                                    |
| Li <sub>2</sub> O              | 4              | -57.253               | -14.313                       |                                    |
| Mn <sub>3</sub> O <sub>4</sub> | 2 <sup>b</sup> | -106.650              | -53.325                       |                                    |
| NiO                            | 8 <sup>c</sup> | -80.735               | -10.092                       |                                    |
| ZnO                            | 2              | -17.859               | -8.929                        |                                    |
| O <sub>2</sub>                 | 1 <sup>b</sup> | -9.877                | -9.877                        |                                    |
| LFNM-CuZn                      | 10             | -403.618              | -40.362                       | <b>1.99</b>                        |
| LFNM-CoZn                      | 10             | -426.354              | -42.635                       | 1.10                               |
| LFNM-CoCu                      | 10             | -419.748              | -41.975                       | 0.33                               |

<sup>a</sup>  $Z$ : the number of formula units in the calculated unit cell.

<sup>b</sup> The primitive cell was used in the calculations.

<sup>c</sup> A  $2 \times 2 \times 2$  supercell of the primitive cell was used to obtain antiferromagnetic configuration.

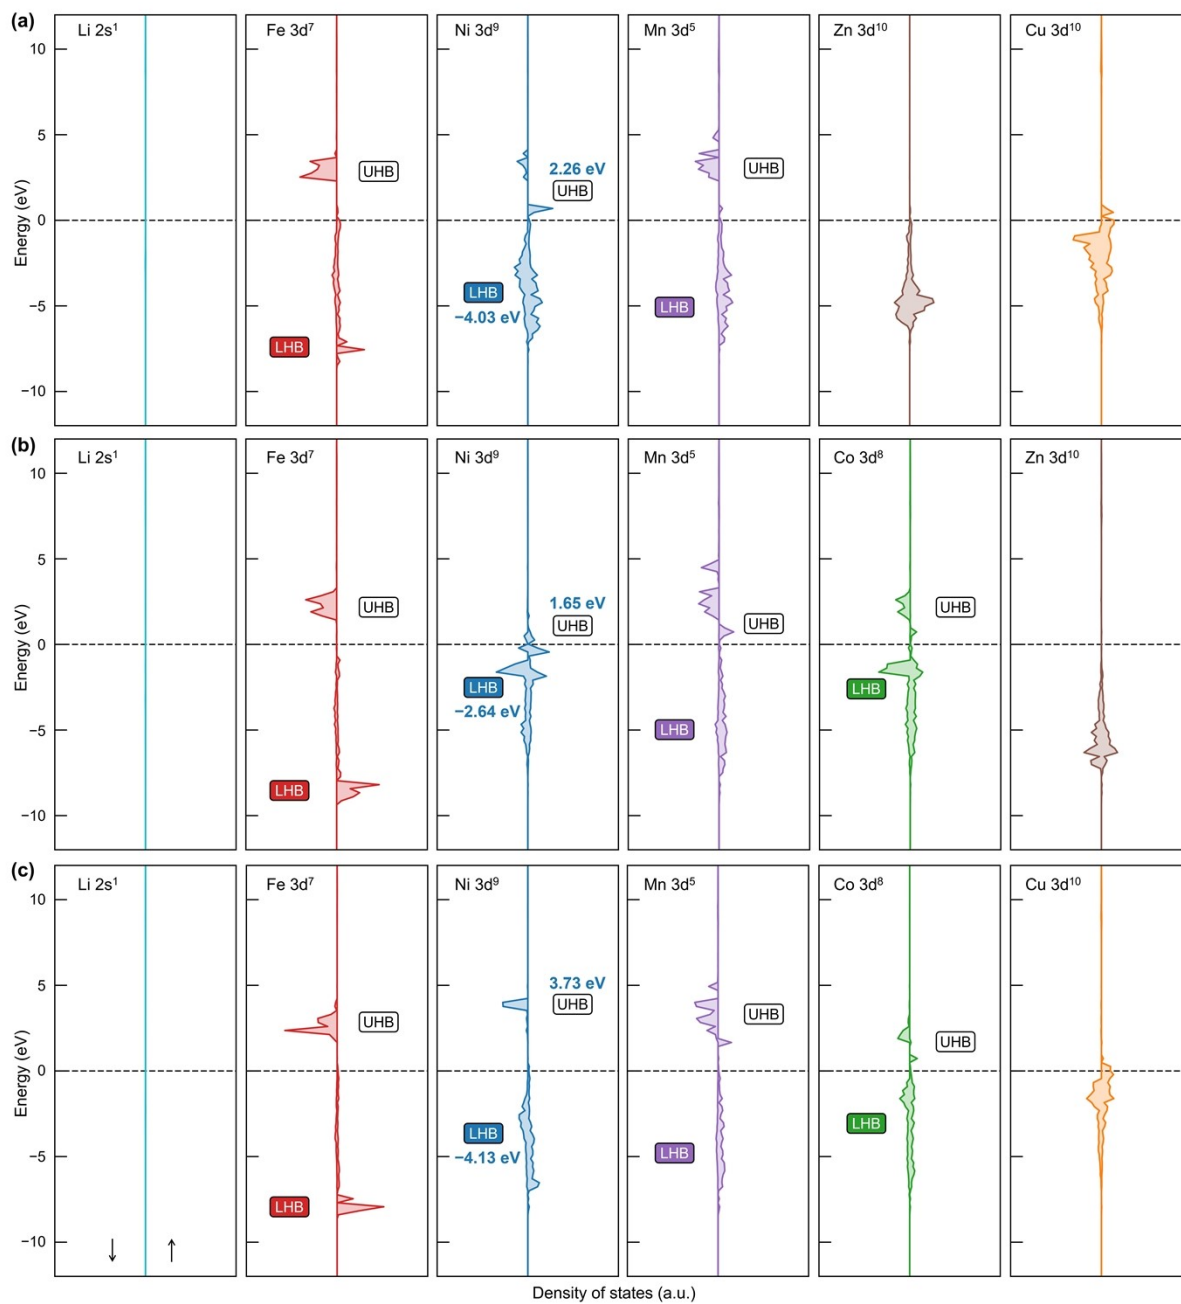

**Figure S6.** Metal-projected DOS of (a) LFNM-CuZn, (b) LFNM-CoZn, and (c) LFNM-CoCu.

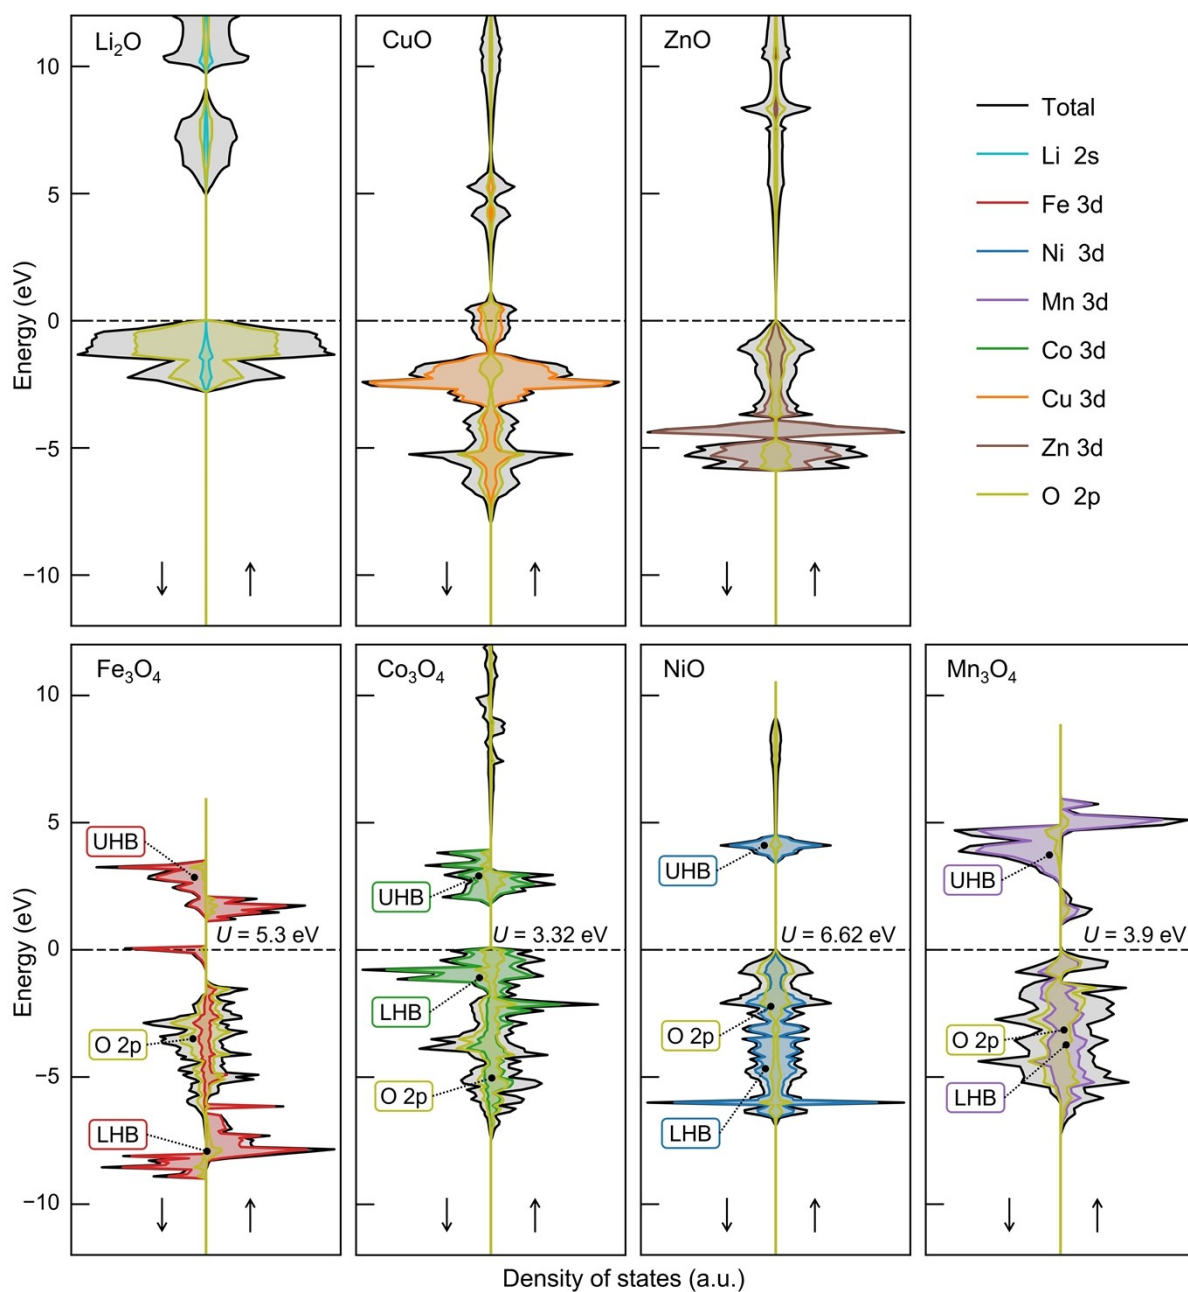

**Figure S7.** DOS of metal-oxides. The first row was obtained from pure DFT (PBE) calculations, while the second row from DFT+*U* calculations, and the lower Hubbard band (LHB) and upper Hubbard band (UHB) of metals, and O 2p bands are indicated. The Fermi energy is set at 0 eV.



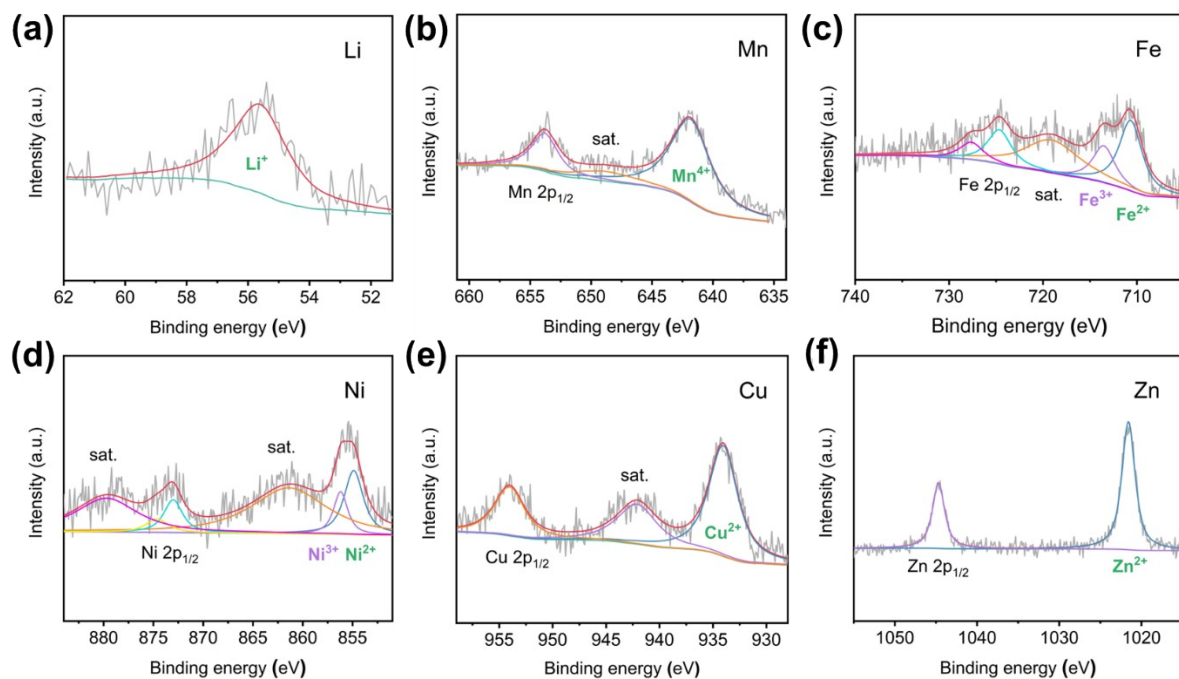

**Figure S8.** XPS a) Li 1s, b) Fe 2p, c) Ni 2p, d) Mn 2p, e) Cu 2p, f) Zn 2p spectra of LFNM-CuZn sample.

**Table S5.** The comparison of HEO anodes with alkali-metal and without cobalt

| Material                                                                         | Cycling performance                                               | High-rate performance                                                                                | Reference |
|----------------------------------------------------------------------------------|-------------------------------------------------------------------|------------------------------------------------------------------------------------------------------|-----------|
| HEOs with alkali-metal                                                           |                                                                   |                                                                                                      |           |
| (MgCoNiCuZnLi)O                                                                  | 417 mAh g <sup>-1</sup> after 300 cycles @ 1.0 A g <sup>-1</sup>  | 301 mAh g <sup>-1</sup> @ 5.0 A g <sup>-1</sup>                                                      | 2         |
| (MgCoNiZn) <sub>0.65</sub> Li <sub>0.35</sub> O                                  | 610 mAh g <sup>-1</sup> after 100 cycles @ 1.0 A g <sup>-1</sup>  | 680 mAh g <sup>-1</sup> @ 1.0 A g <sup>-1</sup>                                                      | 3         |
| (FeCoNiCrMnZnLi) <sub>3</sub> O <sub>4</sub>                                     | 522 mAh g <sup>-1</sup> after 100 cycles @ 0.05 A g <sup>-1</sup> | 173 mAh g <sup>-1</sup> @ 2.0 A g <sup>-1</sup>                                                      | 4         |
| (FeCoNiZnMnLi) <sub>3</sub> O <sub>4</sub>                                       | 605 mAh g <sup>-1</sup> after 100 cycles @ 0.1 A g <sup>-1</sup>  | 225 mAh g <sup>-1</sup> @ 2.0 A g <sup>-1</sup>                                                      | 5         |
| (CrCoNiZnMnLi) <sub>3</sub> O <sub>4</sub>                                       | 460 mAh g <sup>-1</sup> after 100 cycles @ 0.1 A g <sup>-1</sup>  | 145 mAh g <sup>-1</sup> @ 2.0 A g <sup>-1</sup>                                                      | 5         |
| Li <sub>1.8</sub> (FeCoZnCrMn) <sub>3</sub> O <sub>x</sub>                       | 484 mAh g <sup>-1</sup> after 300 cycles @ 0.5 A g <sup>-1</sup>  | 146 mAh g <sup>-1</sup> @ 1.0 A g <sup>-1</sup>                                                      | 6         |
| Li <sub>0.1</sub> (LiLaCaSrBa)Ti <sub>0.9</sub> Al <sub>0.1</sub> O <sub>3</sub> | 57 mAh g <sup>-1</sup> after 100 cycles @ 0.1 A g <sup>-1</sup>   | 37 mAh g <sup>-1</sup> @ 1.0 A g <sup>-1</sup>                                                       |           |
| HEOs without cobalt                                                              |                                                                   |                                                                                                      |           |
| (FeNiCrMnZn) <sub>3</sub> O <sub>4</sub>                                         | 387 mAh g <sup>-1</sup> after 185 cycles @ 0.5 A g <sup>-1</sup>  | 300 mAh g <sup>-1</sup> @ 2.0 A g <sup>-1</sup>                                                      | 7         |
| (MgTiZnCuFe) <sub>3</sub> O <sub>4</sub>                                         | 504 mAh g <sup>-1</sup> after 300 cycles @ 0.5 A g <sup>-1</sup>  | 272 mAh g <sup>-1</sup> @ 2.0 A g <sup>-1</sup>                                                      | 8         |
| (CrMnFeNiCu) <sub>3</sub> O <sub>4</sub>                                         | ~632 mAh g <sup>-1</sup> after 250 cycles @ 0.5 A g <sup>-1</sup> | 451 mAh g <sup>-1</sup> @ 2.0 A g <sup>-1</sup>                                                      | 9         |
| (CrMnFeNiCu) <sub>3</sub> O <sub>4</sub>                                         | ~691 mAh g <sup>-1</sup> after 200 cycles @ 0.5 A g <sup>-1</sup> | 480 mAh g <sup>-1</sup> @ 2.0 A g <sup>-1</sup>                                                      | 10        |
| (CrMnFeNiZn) <sub>3</sub> O <sub>4</sub>                                         | ~668 mAh g <sup>-1</sup> after 200 cycles @ 0.5 A g <sup>-1</sup> | 560 mAh g <sup>-1</sup> @ 3.0 A g <sup>-1</sup>                                                      | 11        |
| (LiFeNiMnCuZn) <sub>3</sub> O <sub>4</sub> nanoparticles                         | 865 mAh g <sup>-1</sup> after 800 cycles @ 0.5 A g <sup>-1</sup>  | 585 mAh g <sup>-1</sup> @ 2.0 A g <sup>-1</sup> ,<br>436 mAh g <sup>-1</sup> @ 5.0 A g <sup>-1</sup> | This work |

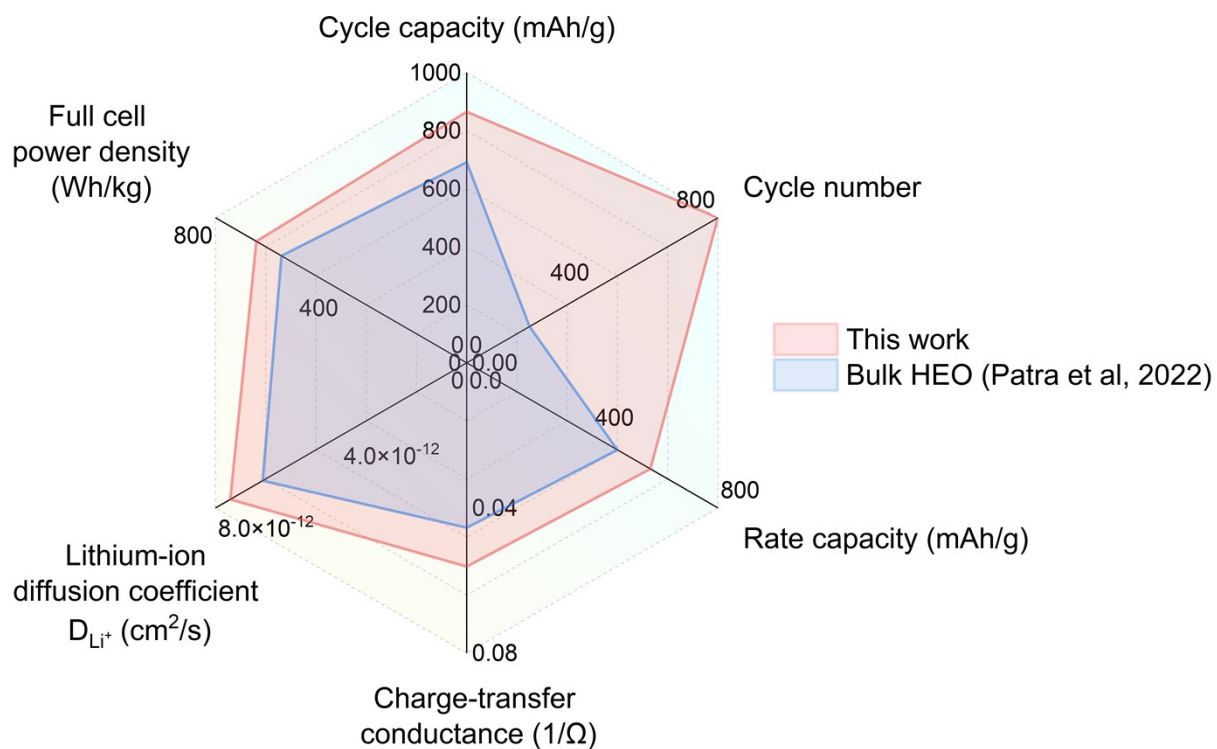

**Figure S9.** The comprehensive comparison of the performances between the LFNM-CuZn HEO nanoparticle anode (this work) and a state-of-the-art bulk-HEO anode<sup>11</sup>.

**Table S6.**  $R_b$ ,  $R_{sei}$  and  $R_{ct}$  values of various electrodes by fitting the Nyquist plots

|           | $R_b$ ( $\Omega$ ) | $R_{sei}$ ( $\Omega$ ) | $R_{ct}$ ( $\Omega$ ) |
|-----------|--------------------|------------------------|-----------------------|
| LFNM-CuZn | 14.2               | 34.0                   | 17.8                  |
| LFNM-CoZn | 22.3               | 53.7                   | 26.4                  |
| LFNM-CoCu | 13.3               | 39.2                   | 29.4                  |
| bulk-HEO  | 6.33               | 12.0                   | 35.9                  |

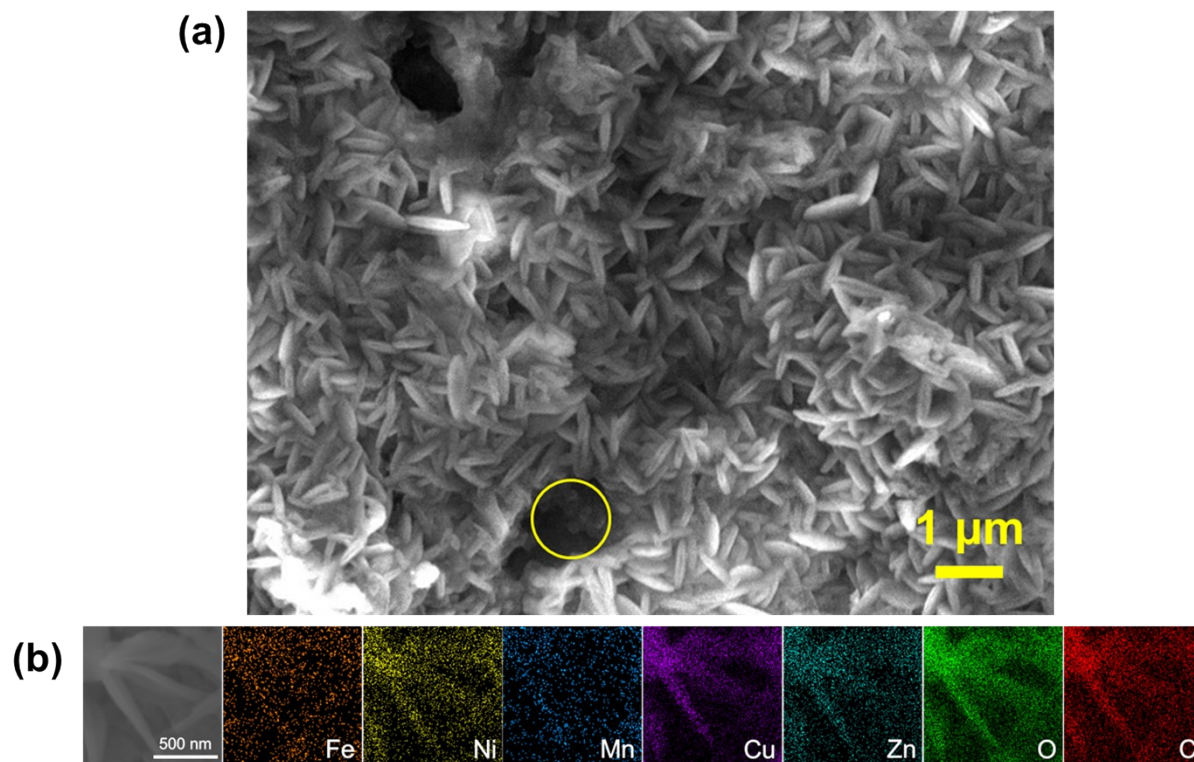

**Figure S10.** a) The SEM image of HEO nanoparticle anode in LIB after 200 cycles. b) The EDX-mapping images regarding Fe, Ni, Mn, Cu, Zn, O and C elements of the electrode after 200 cycles.

**Table S7.** Specific capacity limit of HEO nanoparticle anodes for the various stage of Li insertion

| HEO nanoparticle anodes                                                                                                                        | $x_1(\text{Li})$ | $C_1$ | $x_2(\text{Li})$ | $C_2$ | $x_3(\text{Li})$ | $C_3$ |
|------------------------------------------------------------------------------------------------------------------------------------------------|------------------|-------|------------------|-------|------------------|-------|
| $(\text{Li}_{0.4}\text{Mn}_{0.1}\text{Cu}_{0.5})[\text{Mn}_{0.25}\text{Fe}_{0.3}\text{Zn}_{0.2}\text{Ni}_{0.25}]_2\text{O}_4$                  | 1                | 125   | 2                | 249   | 9                | 1,122 |
| $(\text{Li}_{0.4}\text{Mn}_{0.1}\text{Co}_{0.1}\text{Zn}_{0.4})[\text{Mn}_{0.25}\text{Fe}_{0.25}\text{Co}_{0.25}\text{Ni}_{0.25}]_2\text{O}_4$ | 1                | 123   | 2                | 245   | 9                | 1,104 |
| $(\text{Li}_{0.4}\text{Mn}_{0.1}\text{Cu}_{0.5})[\text{Mn}_{0.25}\text{Fe}_{0.25}\text{Co}_{0.25}\text{Ni}_{0.25}]_2\text{O}_4$                | 1                | 123   | 2                | 246   | 9                | 1,105 |

<sup>^</sup>  $x$  and  $C$  (mAh g<sup>-1</sup>) indicate the molar ratio of inserted Li w.r.t the spinel formula and the specific capacity, respectively. 1, 2, and 3 denote the three stages of lithiation.

The spinel oxides, such as LiMn<sub>2</sub>O<sub>4</sub> and Li<sub>4</sub>Ti<sub>5</sub>O<sub>12</sub>, can serve as Li insertion materials due to their specific oxidation states and structure stability. However, their specific capacities are limited by factors such as the Jahn-Teller distortion and the max amount of inserted Li. The high-entropy oxides (HEOs, AB<sub>2</sub>O<sub>4</sub>) show improved specific capacities (~400 to ~700 mAh g<sup>-1</sup>, Table S5) due to the involvement of additional Wyckoff sites for Li insertion. The chemical reactions during HEO (de)lithiation, which maintain the spinel structure whereby providing high specific capacity, are yet to be clearly revealed. Nevertheless, three stages of lithiation are suggested as the Li insertion mechanism for the spinel HEOs. During stage 1, half of the empty octahedral voids are filled with Li, resulting in a specific capacity of ~125 mAh g<sup>-1</sup>:

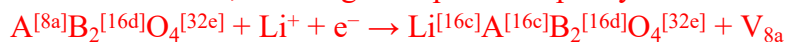

where V<sub>8a</sub> is the 8a tetrahedral vacancies that generate by ion displacement from 8a site to 16c site due to the Coulomb interaction. During stage 2, the generated empty tetrahedral voids are re-occupied, doubling the specific capacity:

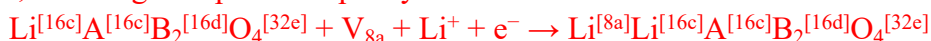

During stage 3, all possible empty tetrahedral voids could be involved, leading to a specific capacity of ~1, 100 mAh g<sup>-1</sup>:

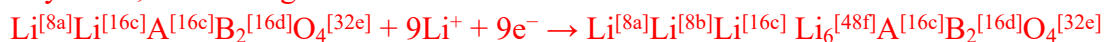

These stages involve specific chemical reactions that maintain the spinel-like framework of the anode materials leading to high specific capacity, which might be benefited from the co-existence of multiple transition metals with mixed oxidation states, resulting in mitigating the Jahn-Teller distortion and preserving structure stability.

## Appendix

1. The relaxed atomic positions of SQS cell for LFNM-CuZn (in POSCAR format), where the Tc denotes the Mn atoms in tetrahedral sites.

```
LFNM-CuZn
8.233390000000000
  1.0000000000000000    0.0000000000000000    0.0000000000000000
  0.5000000000000000    1.0000000000000000    0.5000000000000000
  0.5000000000000000   -0.5000000000000000    1.0000000000000000
Cu  Fe  Li  Mn  Ni  O   Tc  Zn
  5   6   4   5   5  40   1   4
Direct
0.0630521061071434  0.4554578442647212  0.1415337105793171
0.4760013292346201  0.8429731975286145  0.9558584694750039
0.7296893426952806  0.3493653820527456  0.4491271990243746
0.1278805523414803  0.7509608679954169  0.2504634970974209
0.9205817473219042  0.5486158360914928  0.8538634148209994
0.1054218737905686  0.0950248073193549  0.1961315371186103
0.5893565726215897  0.6052046716416370  0.6960253801967653
0.7943156019140076  0.8066130295402161  0.1073953993955641
0.5938394366105726  0.0977327902321150  0.7006362758964002
0.7996783901854272  0.8028126234913202  0.5967704396259066
0.0046912786697391  0.9977639124980371  0.9984096704971464
0.5255708129818331  0.1510185783626952  0.0508909173379095
0.3276710679540287  0.9472878240195115  0.6485173441697683
0.6745522736405505  0.0514700929898879  0.3488212886644675
0.2738764157404248  0.6510704223408084  0.5480254489388514
0.3932842499223810  0.4026425420782687  0.8005612288623212
0.3995570854766086  0.4013522041739321  0.2997264278853606
0.0019117276920326  0.4994944146951710  0.4947473705069996
0.9030951401962710  0.8935465961829934  0.8026124685074620
0.2096960689503575  0.1959312731452272  0.3917479772204260
0.2073358760158115  0.1990996623226451  0.8984016648984863
0.1975948611817273  0.7000445671520552  0.8974538156757390
0.4041094452937628  0.9022733030009178  0.3010214011540171
0.6943569204440436  0.7057009224987425  0.4000697806636495
0.5936990595981726  0.6060441357429340  0.2081302641861953
0.7371537995800779  0.5064836534026540  0.0211429650008697
0.6253925492385406  0.4111016575708746  0.7992716947280911
0.8519454861177778  0.5930283180517080  0.6822460546077238
0.0567586563450249  0.3047259232607615  0.5732639243286144
0.9397281157665276  0.7142037178548080  0.9099710823628087
0.5395235700778258  0.3148272093101241  0.1147257194895204
0.6672858112969635  0.8982121271255608  0.7938449958038731
```

|                    |                    |                    |
|--------------------|--------------------|--------------------|
| 0.4382776836209672 | 0.2117154615002121 | 0.8869190790852741 |
| 0.2422120403967014 | 0.0060485678054718 | 0.0017958155407882 |
| 0.3426437304387520 | 0.0889964728426449 | 0.2154059203182186 |
| 0.5463983908860044 | 0.8072676125849583 | 0.1201279845625649 |
| 0.7719591875860843 | 0.9874446187759318 | 0.9904111798784356 |
| 0.8448861092605995 | 0.0804127505847703 | 0.7093812603157943 |
| 0.4479367377496644 | 0.6937271800047355 | 0.8892938864739506 |
| 0.9787966299979161 | 0.1968489446837367 | 0.3857107830929607 |
| 0.6347406466657759 | 0.8954235375127553 | 0.2965903584264638 |
| 0.5452481375630924 | 0.2978831920949290 | 0.6171248395794464 |
| 0.0717018481172076 | 0.2813625536044313 | 0.0875719847119214 |
| 0.1740265409017212 | 0.9057537583304622 | 0.2971579230003982 |
| 0.2564015557442190 | 0.5025725570280883 | 0.9826379677460082 |
| 0.0411826890642999 | 0.8036127599724168 | 0.0940322738323687 |
| 0.8278206648884492 | 0.6146312511501435 | 0.2120312795169781 |
| 0.9391990881576220 | 0.6901946164363792 | 0.4085138745539183 |
| 0.1566119351675468 | 0.3964804322288416 | 0.3091246049259482 |
| 0.3641096319095425 | 0.5894818095225958 | 0.2092980492854863 |
| 0.7469123114348832 | 0.9967777126466189 | 0.5150446269043130 |
| 0.3469428520814333 | 0.1091303650354831 | 0.7153851605688075 |
| 0.4591599838222180 | 0.7202542807198284 | 0.3855661915661912 |
| 0.2380138675997330 | 0.4926312105167909 | 0.4869225324424633 |
| 0.0264622776394248 | 0.8023093184769934 | 0.6186610757412652 |
| 0.1291445468800276 | 0.8946404088762065 | 0.8084628142249528 |
| 0.3567216076102895 | 0.5872344482105163 | 0.7091052122533412 |
| 0.5708614831093044 | 0.7855919246397534 | 0.5916822595264506 |
| 0.9751555801881295 | 0.1934820746734260 | 0.9059842219645375 |
| 0.7599182252974828 | 0.5095127947893303 | 0.5007445466489244 |
| 0.8761931656564172 | 0.0946020254608868 | 0.1890679537854467 |
| 0.6237754396210988 | 0.4087439984008725 | 0.3043707515478502 |
| 0.4303351413819030 | 0.2148096426911579 | 0.3906527008920762 |
| 0.2574904575711088 | 0.0093147729136049 | 0.4766830434342850 |
| 0.1670816927584724 | 0.3939454332948671 | 0.7975205805171299 |
| 0.8761765064062388 | 0.2478545046645664 | 0.7528715878498744 |
| 0.3058618771980761 | 0.2947726430057287 | 0.5968993394550139 |
| 0.0042694938140926 | 0.9925387943801809 | 0.5011244522210703 |
| 0.4985502171976819 | 0.5018400856977223 | 0.0031796162877242 |
| 0.7982127996127275 | 0.2980713763040157 | 0.1055334386006663 |

2. The relaxed atomic positions of SQS cell for LFNM-CoZn (in POSCAR format), where the Rh and Tc denote the Co and Mn atoms in tetrahedral sites, respectively.

```

LFNM-CoZn
8.237540000000000
1.0000000000000000 0.0000000000000000 0.0000000000000000
0.5000000000000000 1.0000000000000000 0.5000000000000000
0.5000000000000000 -0.5000000000000000 1.0000000000000000
Co Fe Li Mn Ni O Rh Tc Zn
5 5 4 5 5 40 1 1 4
Direct
0.8979305427991551 0.9052996436451193 0.7970323383663035
0.3036958406335595 0.2972524888565971 0.5960067259725158
0.2039958130276708 0.2002670535186084 0.4024378764079869
0.3951686058171624 0.3987987060989731 0.3046317988080574
0.3960495661242223 0.9040240014545868 0.3052520754812144
0.2012275138034148 0.7031315375256747 0.8866899881509511
0.5840318045297582 0.5998606651677105 0.2194061701397943
0.7932571676369489 0.8019358455310052 0.1039647925899737
0.0029324110566913 0.0119153300159112 0.5015318629444132
0.8064963015042299 0.8010714425290005 0.5985307879665754
0.7260495215162478 0.3419609932996087 0.4538118652686129
0.8759958563423796 0.2515318951244566 0.7421180637175241
0.2730825314615125 0.6534006899324813 0.5535489644549145
0.3327038249883681 0.9455679353637739 0.6414662887845682
0.7956650197792235 0.2990079073959206 0.1033331796232604
0.6074859621087552 0.5941857360725381 0.6959249329633928
0.0018237264403077 0.0025002304891803 0.9924379486534998
0.4968372714485495 0.4996643525813181 0.9997539384701397
0.2035096655802432 0.1983034329769867 0.8897121609750487
0.6973021856967243 0.6982210687823313 0.4048847033744568
0.0070829973222180 0.4915292291537151 0.5043079633408719
0.5964926424487044 0.0997666525003413 0.6966848355100909
0.1018509728167390 0.1022188638909502 0.2017033934157615
0.4058857842053364 0.3996638660300205 0.7923322522990222
0.5254341784471819 0.3202566088636820 0.1067232577662658
0.4586790751160778 0.6830366347525487 0.8923805627372340
0.6569390457462236 0.9080269677075120 0.7860185756935713
0.6510446159787577 0.8918719029985752 0.2951637578744617
0.2270074156561789 0.0145602785975004 0.9939059590087683
0.3393926827818729 0.0990821277622767 0.2181512547354205
0.5452483988311672 0.7994493403989905 0.1207361117191730
0.7737070557261140 0.9912938274907848 0.9882764333244067
0.8297003572799827 0.0931312985001281 0.7016634130079700
0.9480005163730796 0.7115004452020066 0.9037484123946313

```



|                    |                    |                    |
|--------------------|--------------------|--------------------|
| 0.0783157136169800 | 0.3004859577327172 | 0.5832380494073508 |
| 0.8476551528701471 | 0.5978298433696251 | 0.6861768690363877 |
| 0.6361425455771411 | 0.4178705303721182 | 0.8098785330213825 |
| 0.7275293804648107 | 0.4932773368344941 | 0.0182129924478873 |
| 0.4427381959194990 | 0.1953311052502939 | 0.8828335861546542 |
| 0.9776515386130458 | 0.1958379147371404 | 0.3980048546704151 |
| 0.1699487616798926 | 0.3780062801425344 | 0.7890412390049000 |
| 0.5316436444833087 | 0.2860622786810392 | 0.6109481175510386 |
| 0.0670907841379897 | 0.2861177508282317 | 0.0773320176761866 |
| 0.1489464441531605 | 0.9113067927059945 | 0.3100867743055511 |
| 0.2679846345010399 | 0.5105324277106547 | 0.9869003971671326 |
| 0.0452118342722329 | 0.8123280708378426 | 0.0818600809509639 |
| 0.8236768758207421 | 0.6145554543876012 | 0.2124987794345367 |
| 0.9367939885917611 | 0.6850370834539633 | 0.4135612596657193 |
| 0.1597622431675540 | 0.3922529544811281 | 0.3252684458149864 |
| 0.3627749529941420 | 0.5823097087823956 | 0.1965282974802096 |
| 0.2509813529814110 | 0.4791896296716414 | 0.4951485899610776 |
| 0.3553474282300935 | 0.1141570382316577 | 0.6976668273926530 |
| 0.7524395866933354 | 0.0006835013304903 | 0.5135034183647467 |
| 0.2540408349952034 | 0.0097777796847465 | 0.4809591950518279 |
| 0.4618312939062038 | 0.7090234513118662 | 0.3975020643344094 |
| 0.1360642381120080 | 0.9033256849736767 | 0.8125055313351690 |
| 0.3720451235505561 | 0.5980742066016349 | 0.7044433344007857 |
| 0.5752153962636066 | 0.7766518635324317 | 0.5967932636874973 |
| 0.9611544722422354 | 0.1932892326949750 | 0.9084771026653738 |
| 0.7625997142097051 | 0.5013606981061719 | 0.5139398379197151 |
| 0.8607116402449922 | 0.1048142723259681 | 0.1779851162994260 |
| 0.6345425869434103 | 0.3980571604718033 | 0.2915924697857821 |
| 0.4245769413932634 | 0.2203792318987348 | 0.4052682945574178 |
| 0.0275084974657150 | 0.8178191134039346 | 0.6130270664412522 |
| 0.5192681425134116 | 0.1486168768310772 | 0.0486749962338970 |
| 0.0785812315667687 | 0.4467592462600646 | 0.1567093009685729 |
| 0.9264307158197109 | 0.5433725481750561 | 0.8515640764090980 |
| 0.6675812250915560 | 0.0566963726338775 | 0.3526721420433714 |
| 0.4737535832815377 | 0.8520425571993400 | 0.9527865679436216 |
| 0.1197524326071127 | 0.7534790441422200 | 0.2521378644741719 |

3. The relaxed atomic positions of SQS cell for LFNM-CoCu (in POSCAR format), where the Tc denote the Mn atoms in tetrahedral sites, respectively.

```

LFNM-CoCu
8.198190000000000
  1.0000000000000000    0.0000000000000000    0.0000000000000000
  0.5000000000000000    1.0000000000000000    0.5000000000000000
  0.5000000000000000   -0.5000000000000000    1.0000000000000000
Co  Cu  Fe  Li  Mn  Ni  O  Tc
  5   5   5   4   5   5   5   40   1
Direct
0.9962835907834399  0.0004118096501619  0.0026148207047680
0.8021351406737727  0.8013249268999552  0.1001197841216871
0.9000675310818993  0.8967812464276320  0.8069477237860730
0.0010735044130555  0.4981149663128451  0.4994785165102820
0.2953454756446689  0.3010840264959180  0.6026398006159636
0.4796979364705312  0.8479343196911463  0.9523514572019115
0.1313589562206335  0.7476590259175938  0.2433674291724092
0.7210926083214361  0.3412126911674262  0.4564121184903682
0.5241642422505838  0.1536045933599701  0.0472820089877338
0.2837069975582467  0.6455327582376239  0.5449849300645150
0.3840010169139916  0.4072602206194688  0.8062070572332308
0.4017540993559984  0.9027516190434394  0.3015715749242083
0.3965444814192453  0.4021722087572016  0.3015729881355792
0.8038705783296783  0.7995612510464913  0.6004005153990105
0.9992435756450986  0.9972601091742573  0.4988909450648591
0.6745329256710998  0.0510275302064233  0.3520242674055287
0.9161513469464949  0.5507174124016440  0.8530344466725317
0.0790405548173274  0.4501974865833429  0.1469305989927153
0.3220992669629045  0.9520577042476650  0.6502999382144173
0.6020651153701853  0.6024109063113826  0.6974057009152536
0.2019769396571755  0.2031295434345247  0.4002029765097126
0.2002725666737472  0.1995219992995523  0.8961902146452131
0.8015050698530252  0.2999244922229061  0.1021460142287523
0.7101975077633554  0.6966410211396799  0.3937849392115938
0.6083464532125835  0.5981213070325335  0.1964590345730157
0.0995552624957887  0.1007558597527961  0.1983382422668597
0.4999059026068831  0.5022869179001908  0.9995161843592768
0.1979687995007042  0.7032515039668106  0.9016945065419263
0.5957813333157190  0.0968058334765366  0.6967409050633053
0.7376140473068490  0.4859366732353941  0.0124376637392784
0.8497941684497131  0.0745668053486392  0.7036889955587028
0.2286203683218904  0.0105962939225203  0.9943047070973202
0.3374009242235069  0.1023764574550684  0.2164610390140216
0.5685208818989033  0.8021530592634231  0.1089908663035220

```

|                    |                    |                    |
|--------------------|--------------------|--------------------|
| 0.6762353652575637 | 0.8966408442287460 | 0.7936831885357563 |
| 0.5604631003978489 | 0.3081645199003580 | 0.1040684131670800 |
| 0.4571323294339781 | 0.6922489554156606 | 0.8847732572369117 |
| 0.7705907672416642 | 0.9854614587123853 | 0.9983655323940352 |
| 0.6292101038384160 | 0.4183723491190389 | 0.7958384799162568 |
| 0.8439253164603638 | 0.5970637962999040 | 0.6834631643216503 |
| 0.0682129074209366 | 0.3082765082065999 | 0.5835595137550111 |
| 0.4333106857337547 | 0.2036646052372781 | 0.8896545494707414 |
| 0.9346979001415254 | 0.7240093183140840 | 0.9128281738792924 |
| 0.6625952113816483 | 0.8794229277080041 | 0.2925389727572422 |
| 0.7624019164227275 | 0.9901648710748422 | 0.5076528327714802 |
| 0.0460421581639012 | 0.2900419475749182 | 0.0869005443501940 |
| 0.1608291706959757 | 0.9062417917549977 | 0.3018719327984198 |
| 0.2673415508599032 | 0.5054439554577542 | 0.9887559659570135 |
| 0.0257352071750374 | 0.8176170128585016 | 0.0945781518681307 |
| 0.8384163031747495 | 0.6198409249977229 | 0.2012921412334050 |
| 0.9428006045817352 | 0.6856583724145283 | 0.4092811242230371 |
| 0.1506877547439499 | 0.3945518198078770 | 0.3175868330222743 |
| 0.3674205877814882 | 0.5896246301826198 | 0.1988477758488653 |
| 0.2361388601038051 | 0.4866517578988619 | 0.5031921917800259 |
| 0.3359791596562166 | 0.1200737068276481 | 0.7054122126143794 |
| 0.4753659311139652 | 0.7021919197716038 | 0.3906159196889251 |
| 0.1609692890321963 | 0.3832107404781353 | 0.7955275314665605 |
| 0.2437324354915929 | 0.0114314287466677 | 0.4869785981670855 |
| 0.0358550817219082 | 0.8080244541090215 | 0.6139780277440609 |
| 0.1131227543510574 | 0.9100187178046362 | 0.8202244740517431 |
| 0.3628825711441765 | 0.5989085658474889 | 0.7065694322823471 |
| 0.5732962537739025 | 0.7822449698101365 | 0.5894032877453802 |
| 0.9560244190969721 | 0.1930286488018131 | 0.9169960741168746 |
| 0.7574390788583922 | 0.5124267311229649 | 0.5011660714297973 |
| 0.8609302824753445 | 0.1036280988347616 | 0.1786960703448731 |
| 0.6514746442019737 | 0.3952071584777708 | 0.2871498910942824 |
| 0.4231314771733165 | 0.2139087486115919 | 0.4116084564092597 |
| 0.5184880602708323 | 0.3020558663528293 | 0.6121809990634975 |
| 0.9716644742680621 | 0.1915378128956297 | 0.4009978599113754 |
| 0.8737671162289894 | 0.2477954843404180 | 0.7482694428572025 |

## Reference

1. M. Brahlek, M. Gazda, V. Keppens, A. R. Mazza, S. J. McCormack, A. Mielewczyk-Gryń, B. Musico, K. Page, C. M. Rost, S. B. Sinnott, C. Toher, T. Z. Ward and A. Yamamoto, *APL Materials*, 2022, **10**, 110902.
2. X. Liu, Y. Xing, K. Xu, H. Zhang, M. Gong, Q. Jia, S. Zhang and W. Lei, *Small*, 2022, **18**, 2200524.
3. E. Lökçü, Ç. Toparli and M. Anik, *ACS Applied Materials & Interfaces*, 2020, **12**, 23860-23866.
4. C. Duan, K. Tian, X. Li, D. Wang, H. Sun, R. Zheng, Z. Wang and Y. Liu, *Ceramics International*, 2021, **47**, 32025-32032.
5. K.-H. Tian, C.-Q. Duan, Q. Ma, X.-L. Li, Z.-Y. Wang, H.-Y. Sun, S.-H. Luo, D. Wang and Y.-G. Liu, *Rare Metals*, 2022, **41**, 1265-1275.
6. B. Petrovičová, W. Xu, M. G. Musolino, F. Pantò, S. Patanè, N. Pinna, S. Santangelo and C. Triolo, *Applied Sciences*, 2022, **12**, 5965.
7. B. Xiao, G. Wu, T. Wang, Z. Wei, Y. Sui, B. Shen, J. Qi, F. Wei, Q. Meng, Y. Ren, X. Xue, J. Zheng, J. Mao and K. Dai, *Ceramics International*, 2021, **47**, 33972-33977.
8. H. Chen, N. Qiu, B. Wu, Z. Yang, S. Sun and Y. Wang, *RSC Advances*, 2020, **10**, 9736-9744.
9. T. X. Nguyen, C.-C. Tsai, J. Patra, O. Clemens, J.-K. Chang and J.-M. Ting, *Chemical Engineering Journal*, 2022, **430**, 132658.
10. T. X. Nguyen, J. Patra, C.-C. Tsai, W.-Y. Xuan, H.-Y. T. Chen, M. S. Dyer, O. Clemens, J. Li, S. B. Majumder, J.-K. Chang and J.-M. Ting, *Advanced Functional Materials*, 2023, **33**, 2300509.
11. J. Patra, T. X. Nguyen, C.-C. Tsai, O. Clemens, J. Li, P. Pal, W. K. Chan, C.-H. Lee, H.-Y. T. Chen, J.-M. Ting and J.-K. Chang, *Advanced Functional Materials*, 2022, **32**, 2110992.
